# Supplementary material for: Understanding Processes that Control Dust Spatial Distributions with Global Climate Models and Satellite Observations
Source: Copernicus journal article supplement (doi:10.5194/acp-2020-160), 2020-04-24
Supplement: Supplementary file 1 [file acp-2020-160-supplement.pdf]

1 *Supplement of*  
2 **Understanding Processes that Control Dust Spatial Distributions with**  
3 **Global Climate Models and Satellite Observations**

4 Mingxuan Wu et al.

5 *Correspondence to:* Xiaohong Liu (xiaohong.liu@tamu.edu)

6

7

8

9

10

11

12

13

14

15

16

17

18

19

20

21

22

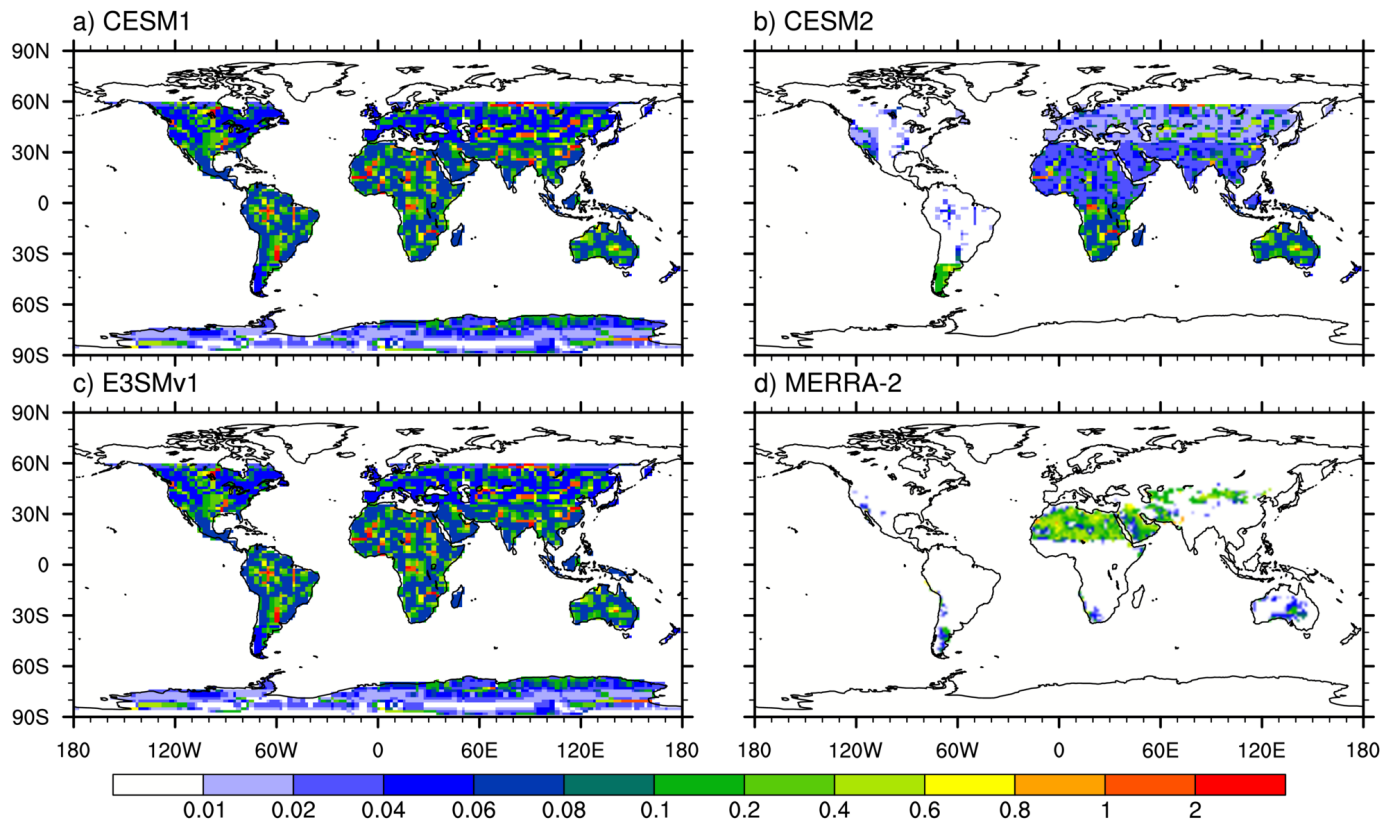

**Figure S1.** Source functions used in the four models.

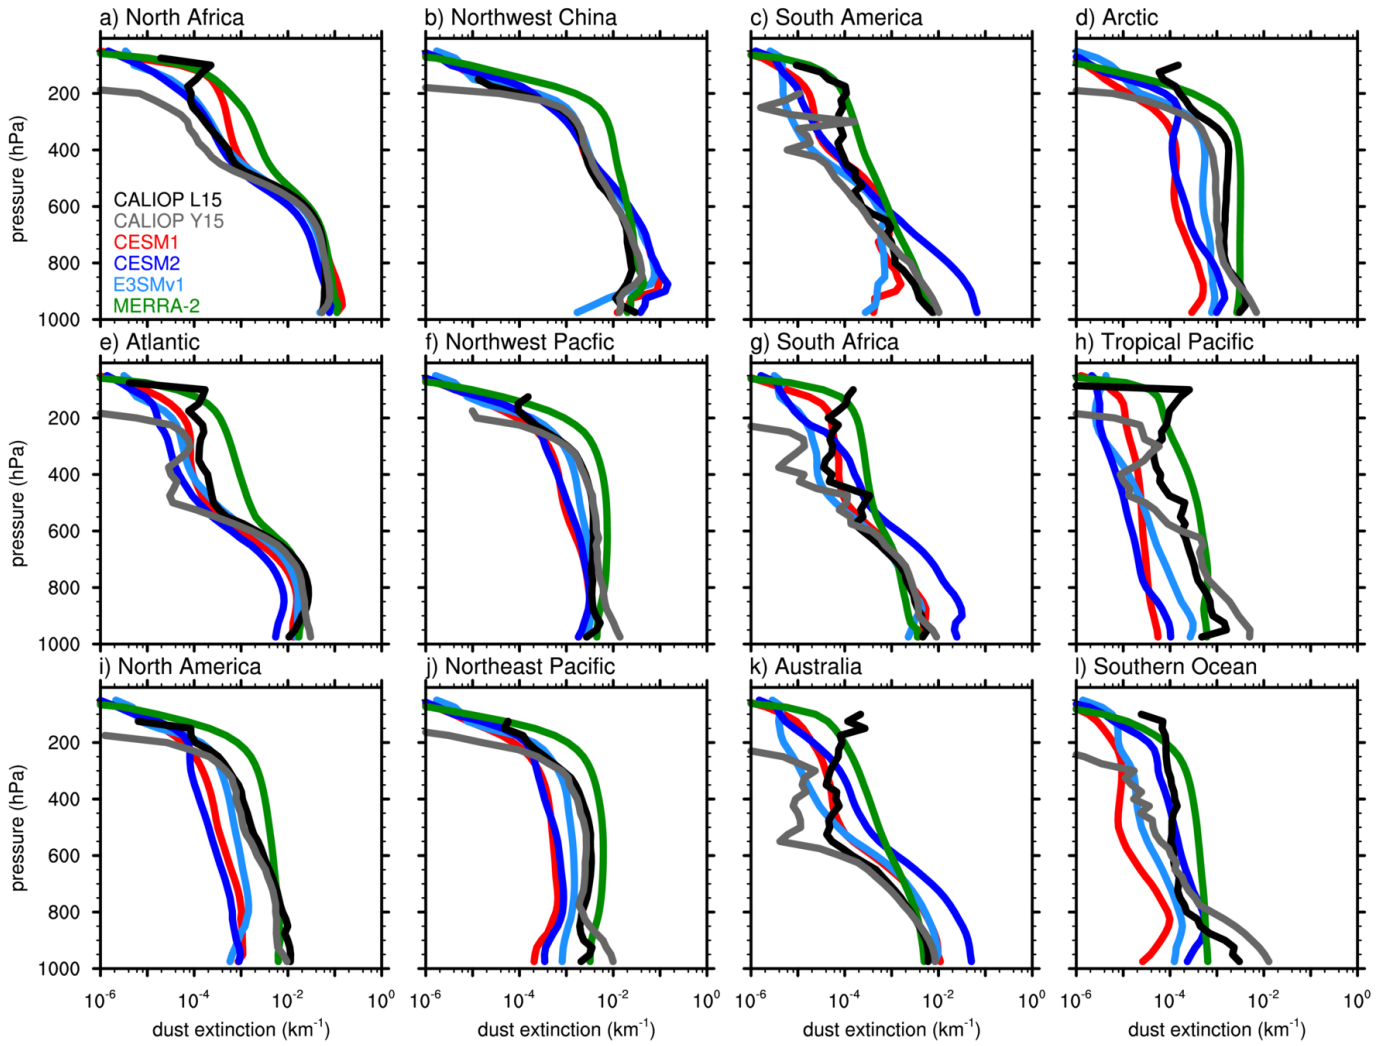

**Figure S2.** Vertical profiles of MAM mean dust extinction ( $\text{km}^{-1}$ ) from model simulations and CALIOP over 12 selected regions during 2007-2009.

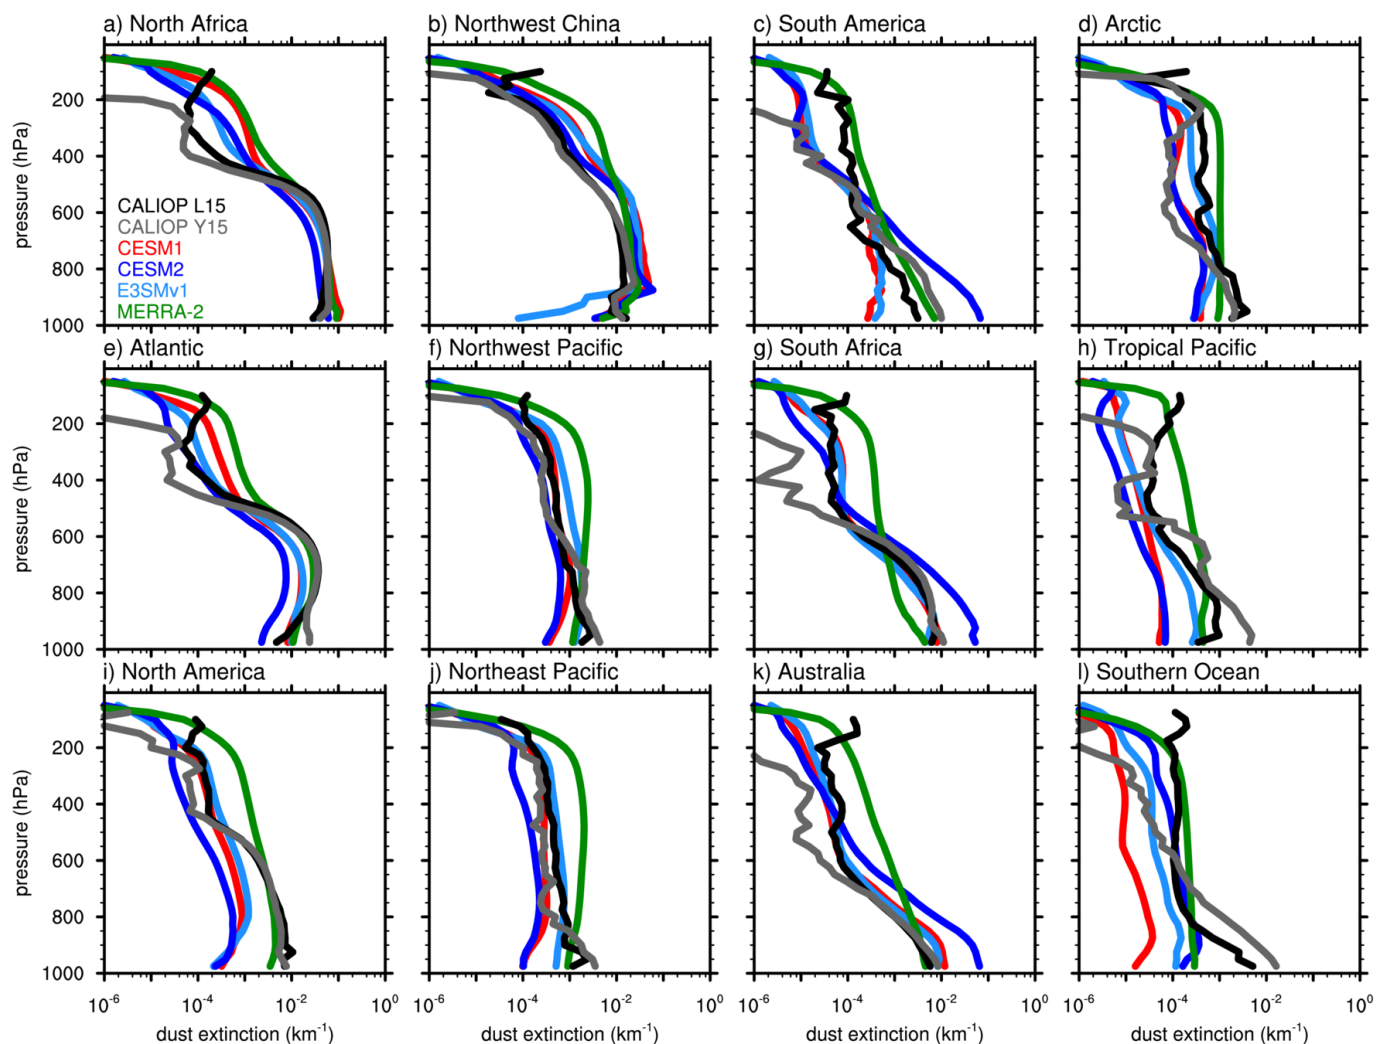

**Figure S3.** Vertical profiles of JJA mean dust extinction ( $\text{km}^{-1}$ ) from model simulations and CALIOP over 12 selected regions during 2007-2009.

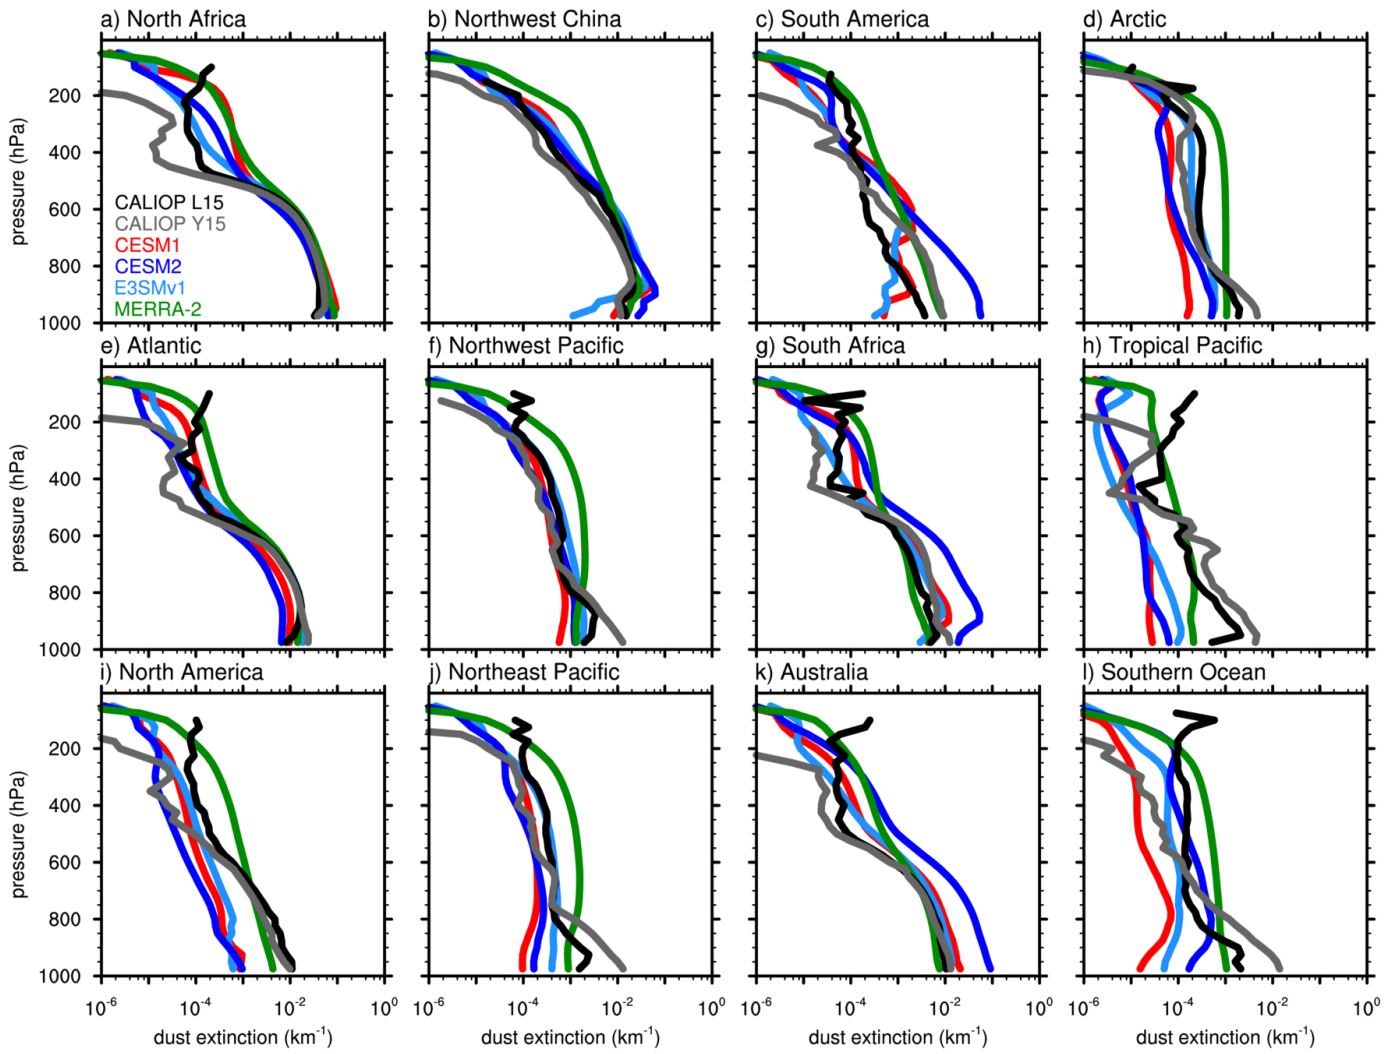

**Figure S4.** Vertical profiles of SON mean dust extinction ( $\text{km}^{-1}$ ) from model simulations and CALIOP over 12 selected regions during 2007-2009.

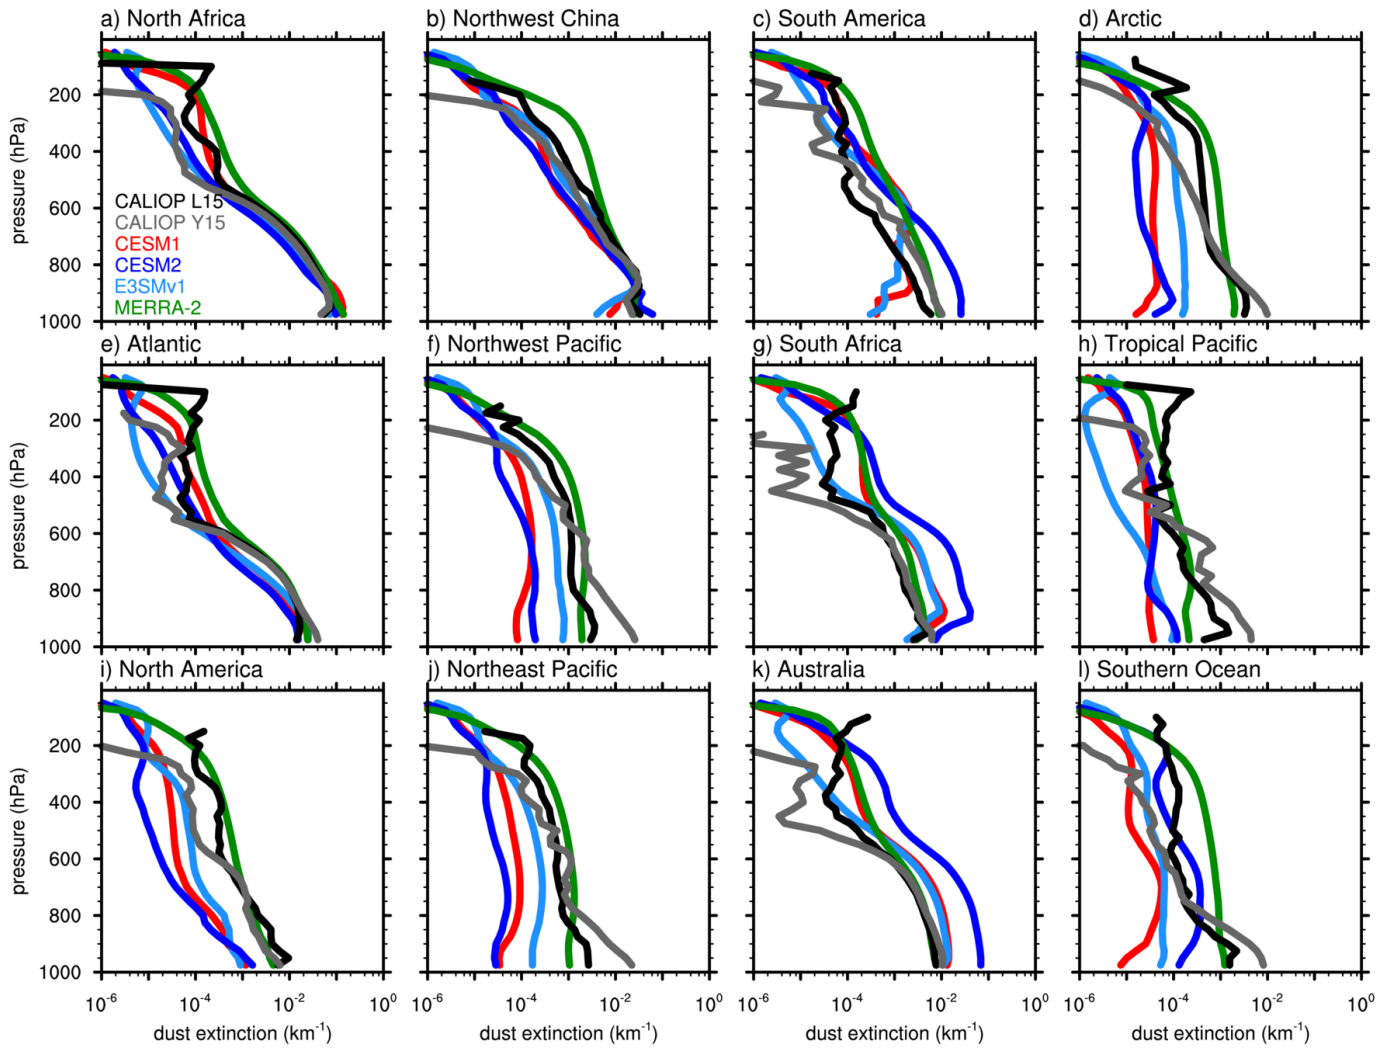

**Figure S5.** Vertical profiles of DJF mean dust extinction ( $\text{km}^{-1}$ ) from model simulations and CALIOP over 12 selected regions during 2007-2009.
